# Supplementary material
Source: PubMed Central journal article supplement (PMC5894333)

**A.**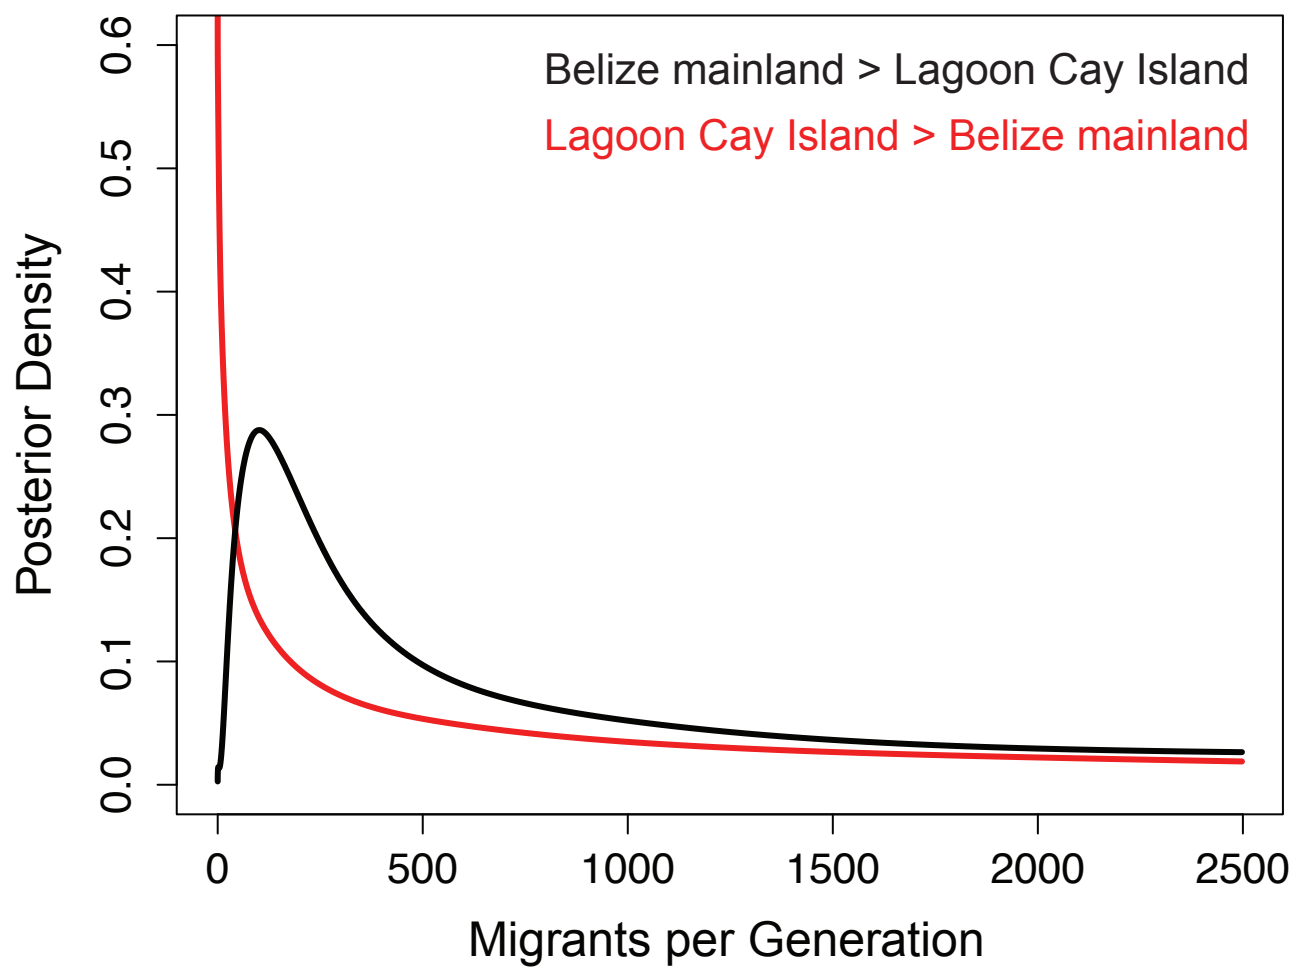**B.**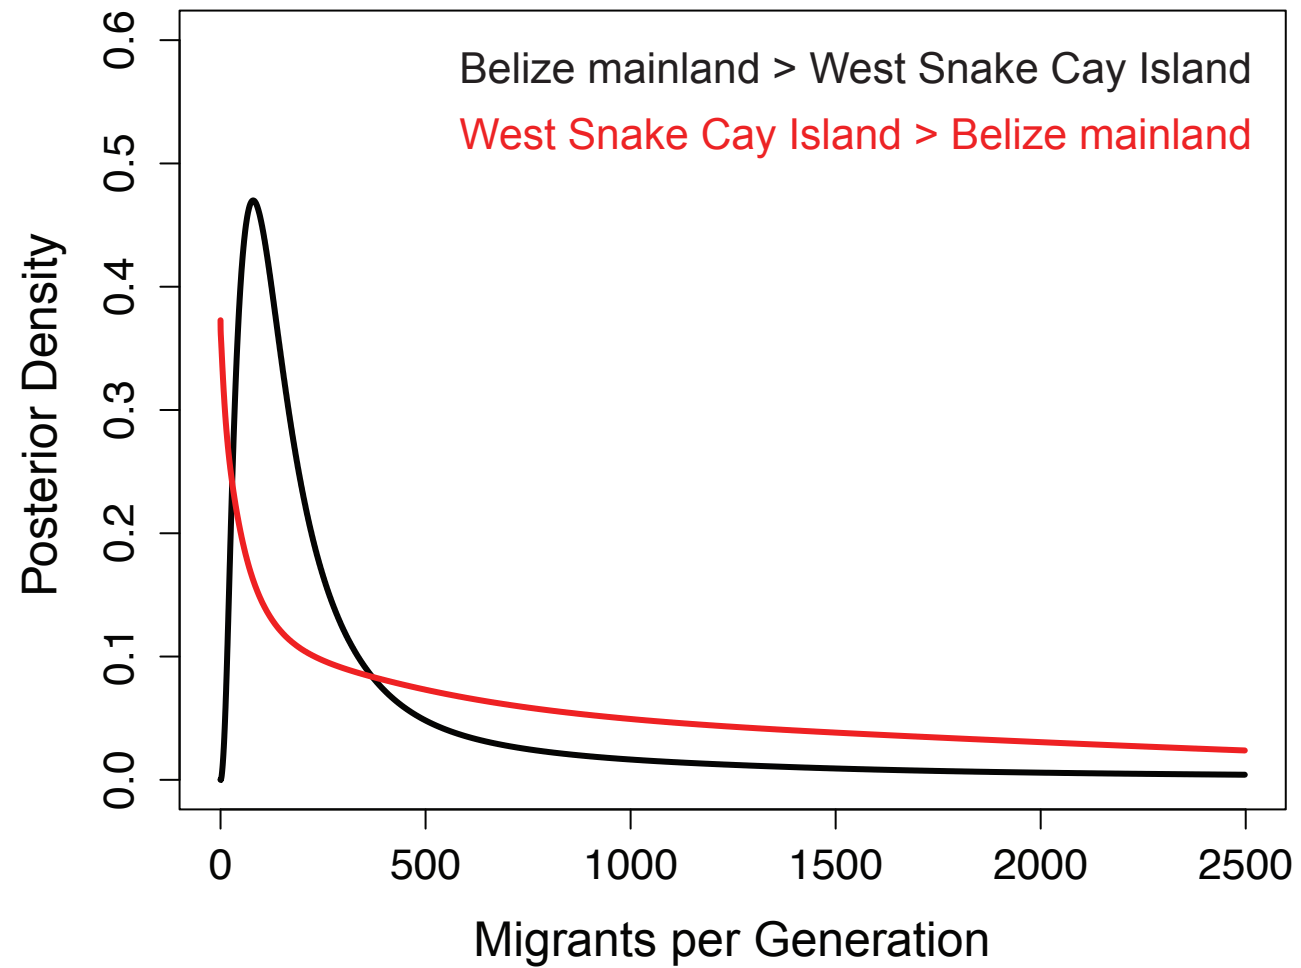**C.**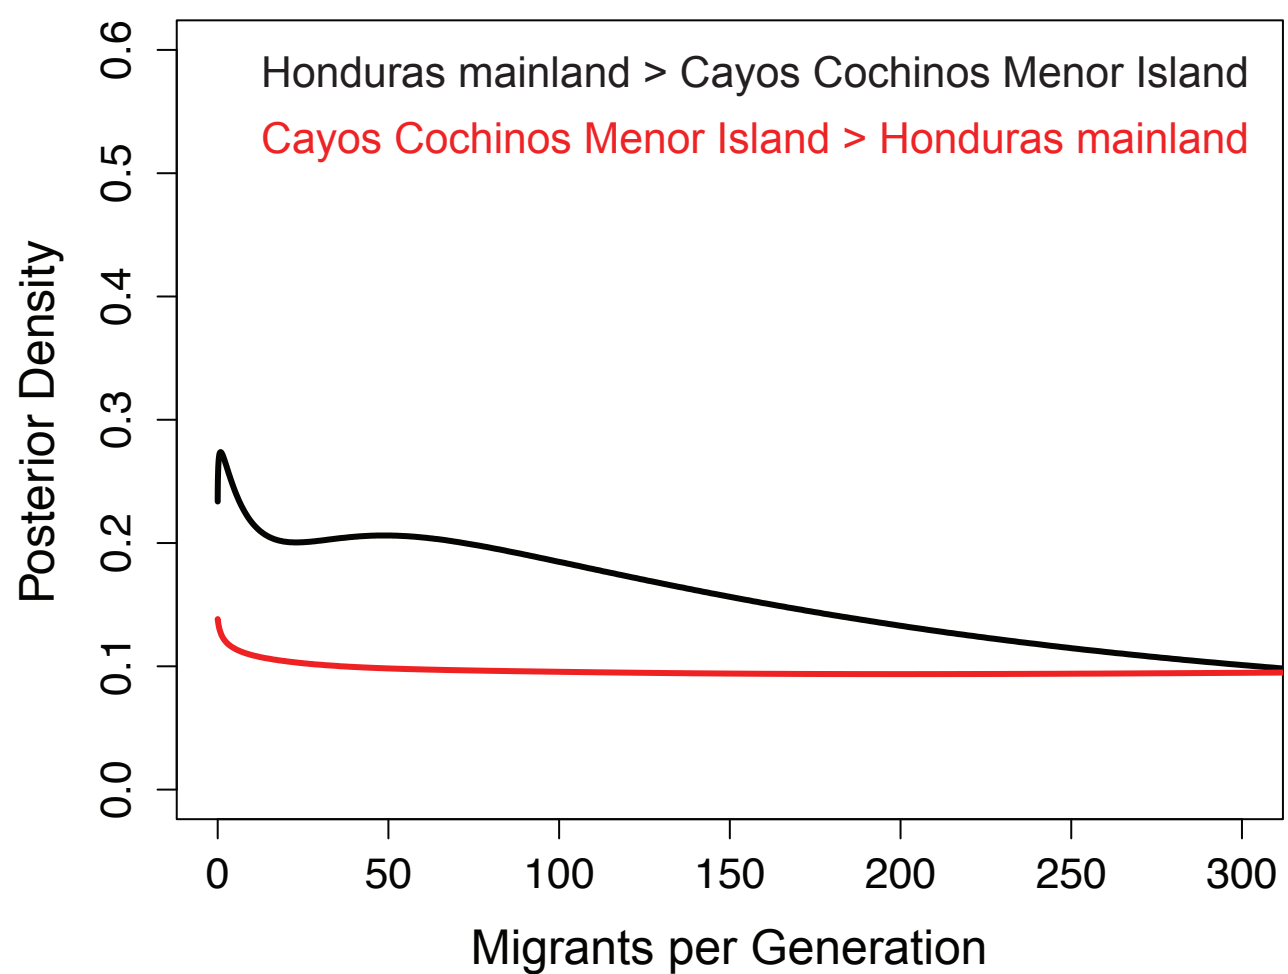**D.**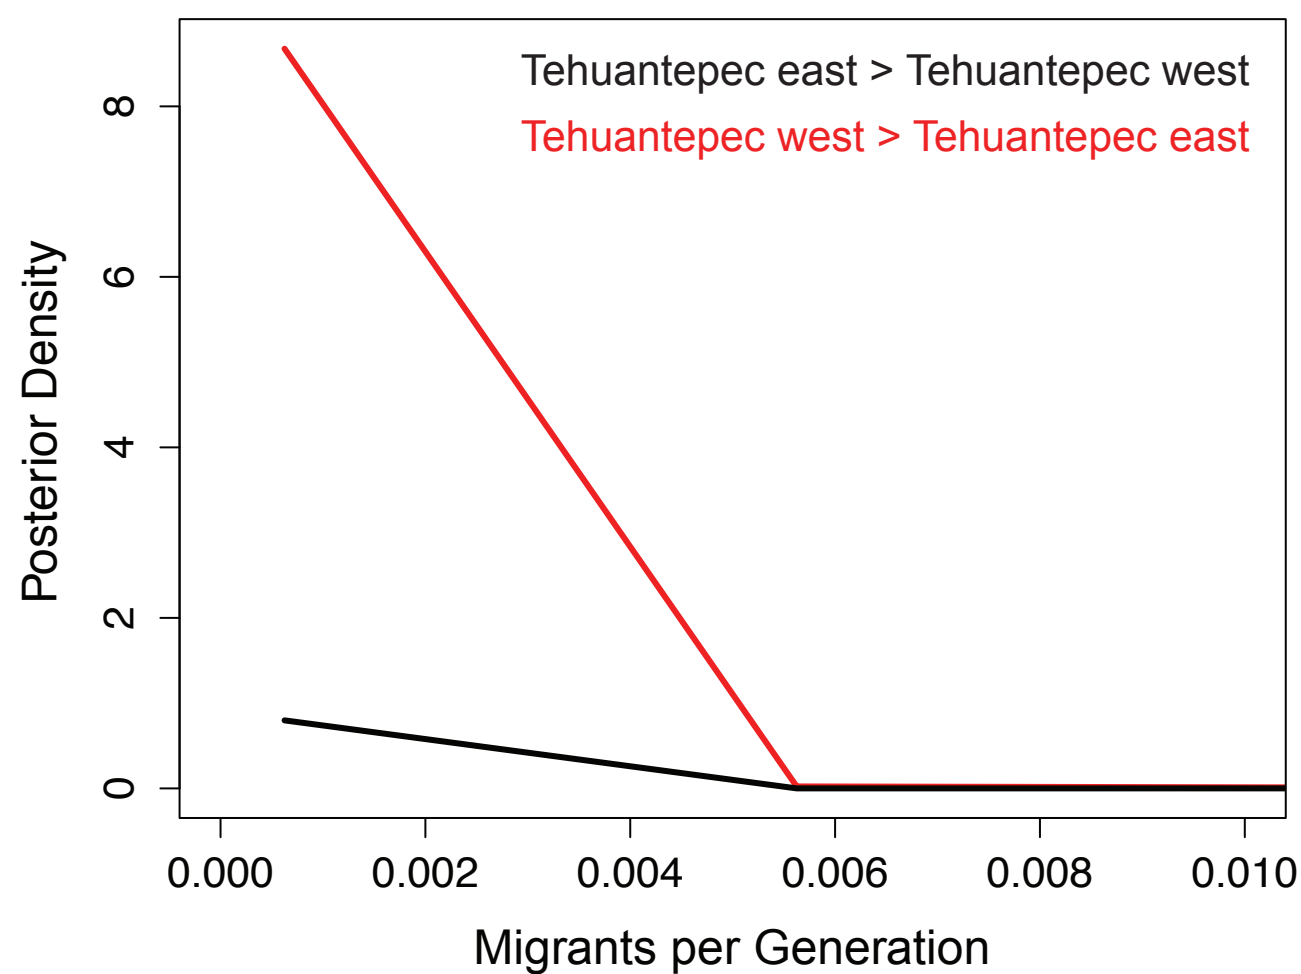

Supplement: NIHMS955144-supplement-Fig_S1.pdf [file NIHMS955144-supplement-Fig_S1.pdf]

Admixture Proportion

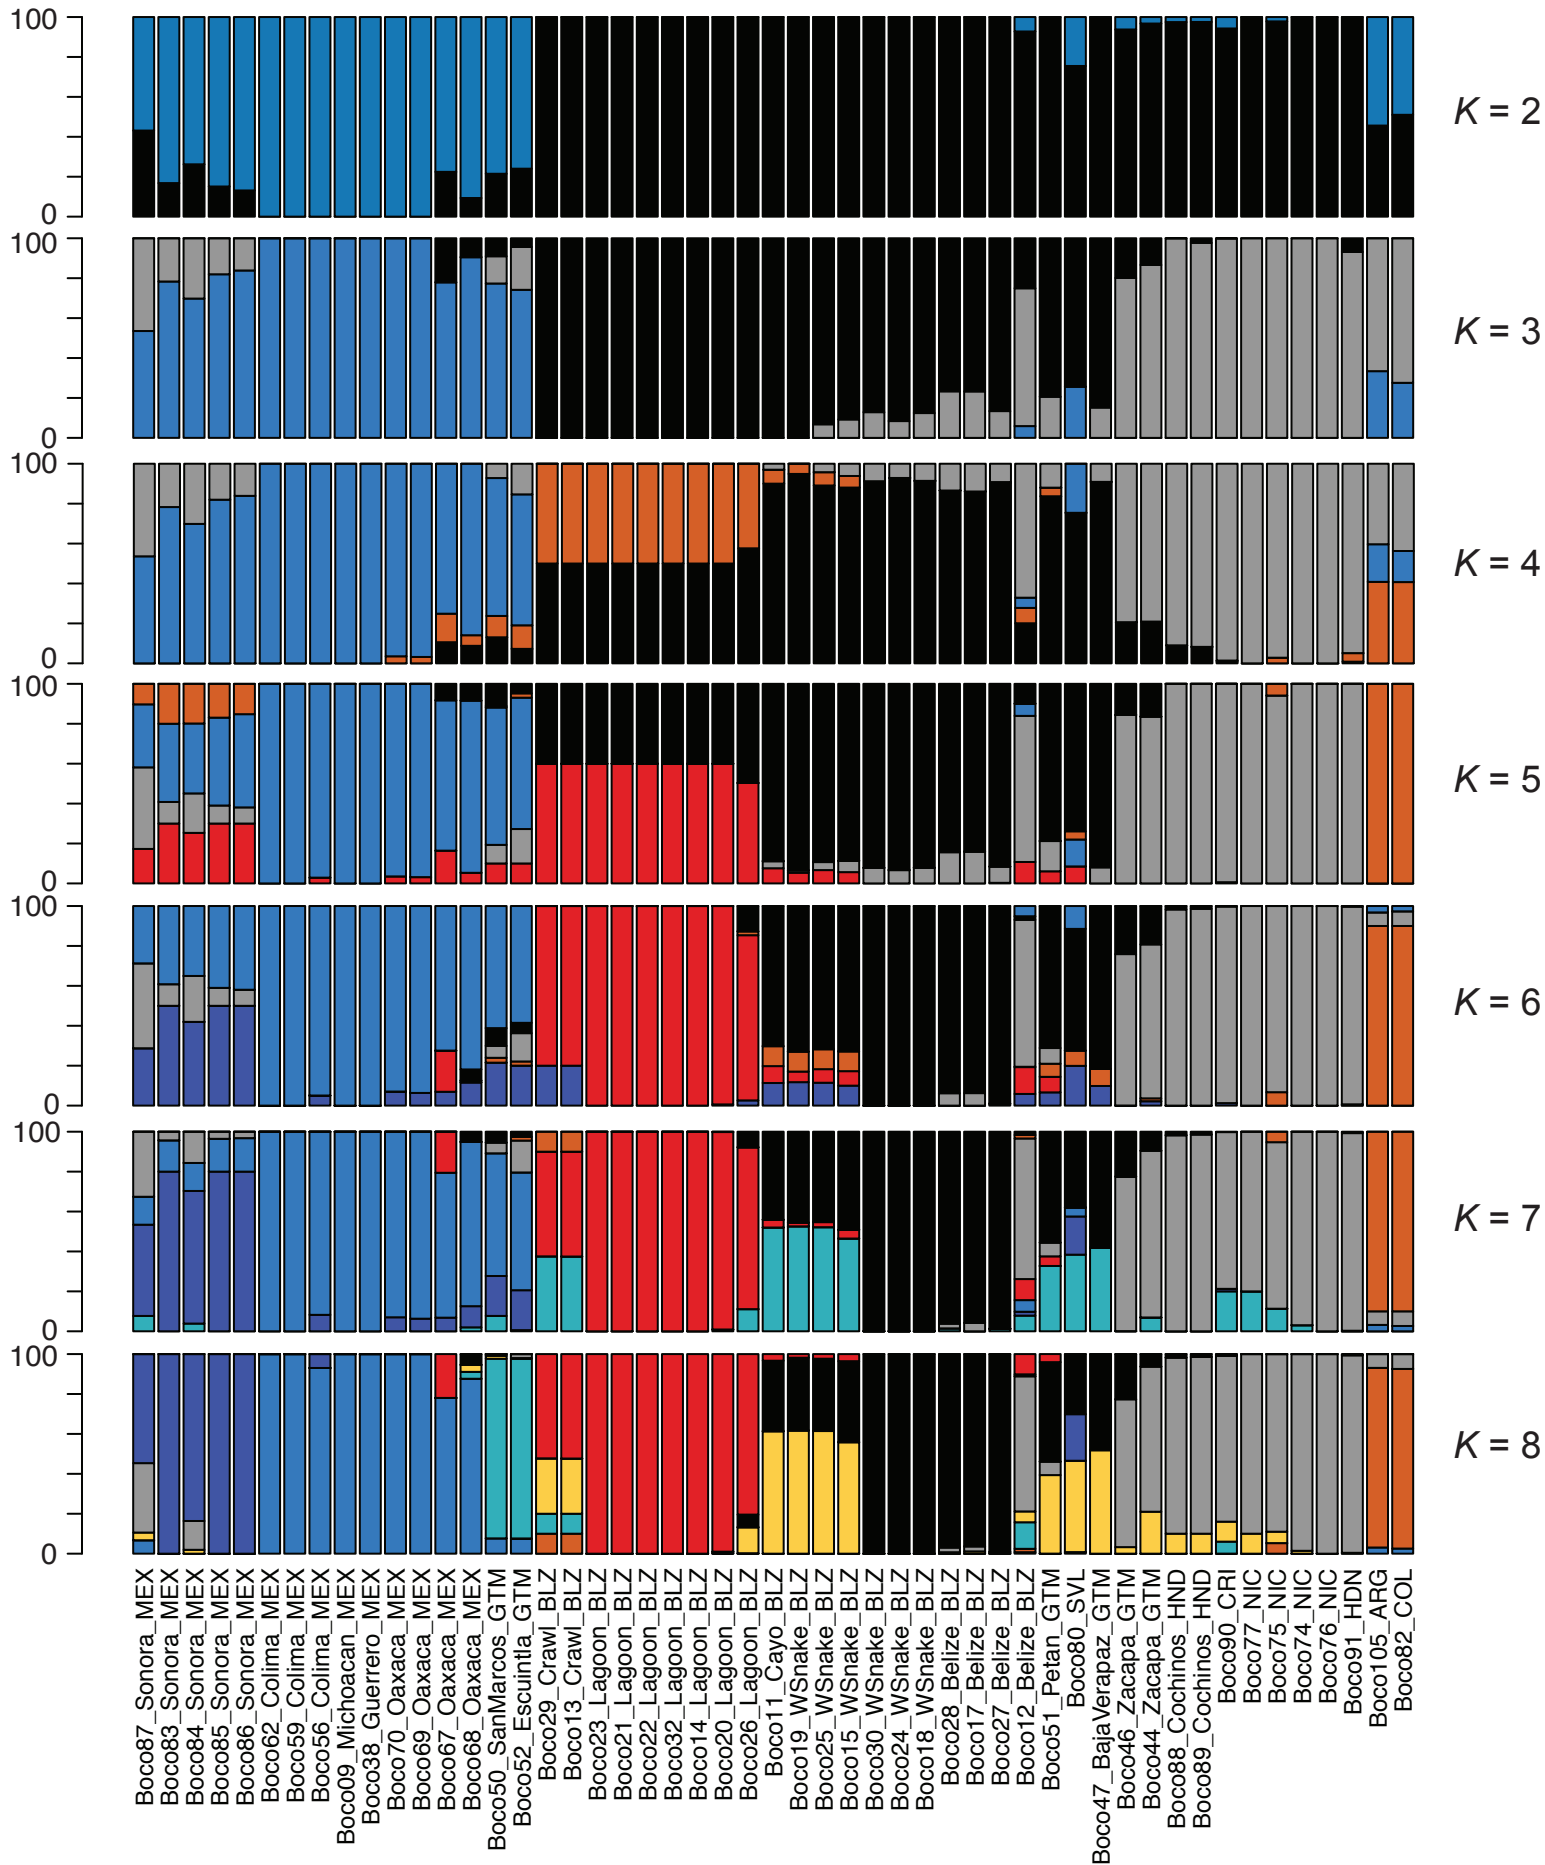

Supplement: NIHMS955144-supplement-Fig_S2.pdf [file NIHMS955144-supplement-Fig_S2.pdf]

# Posterior Admixture Proportion

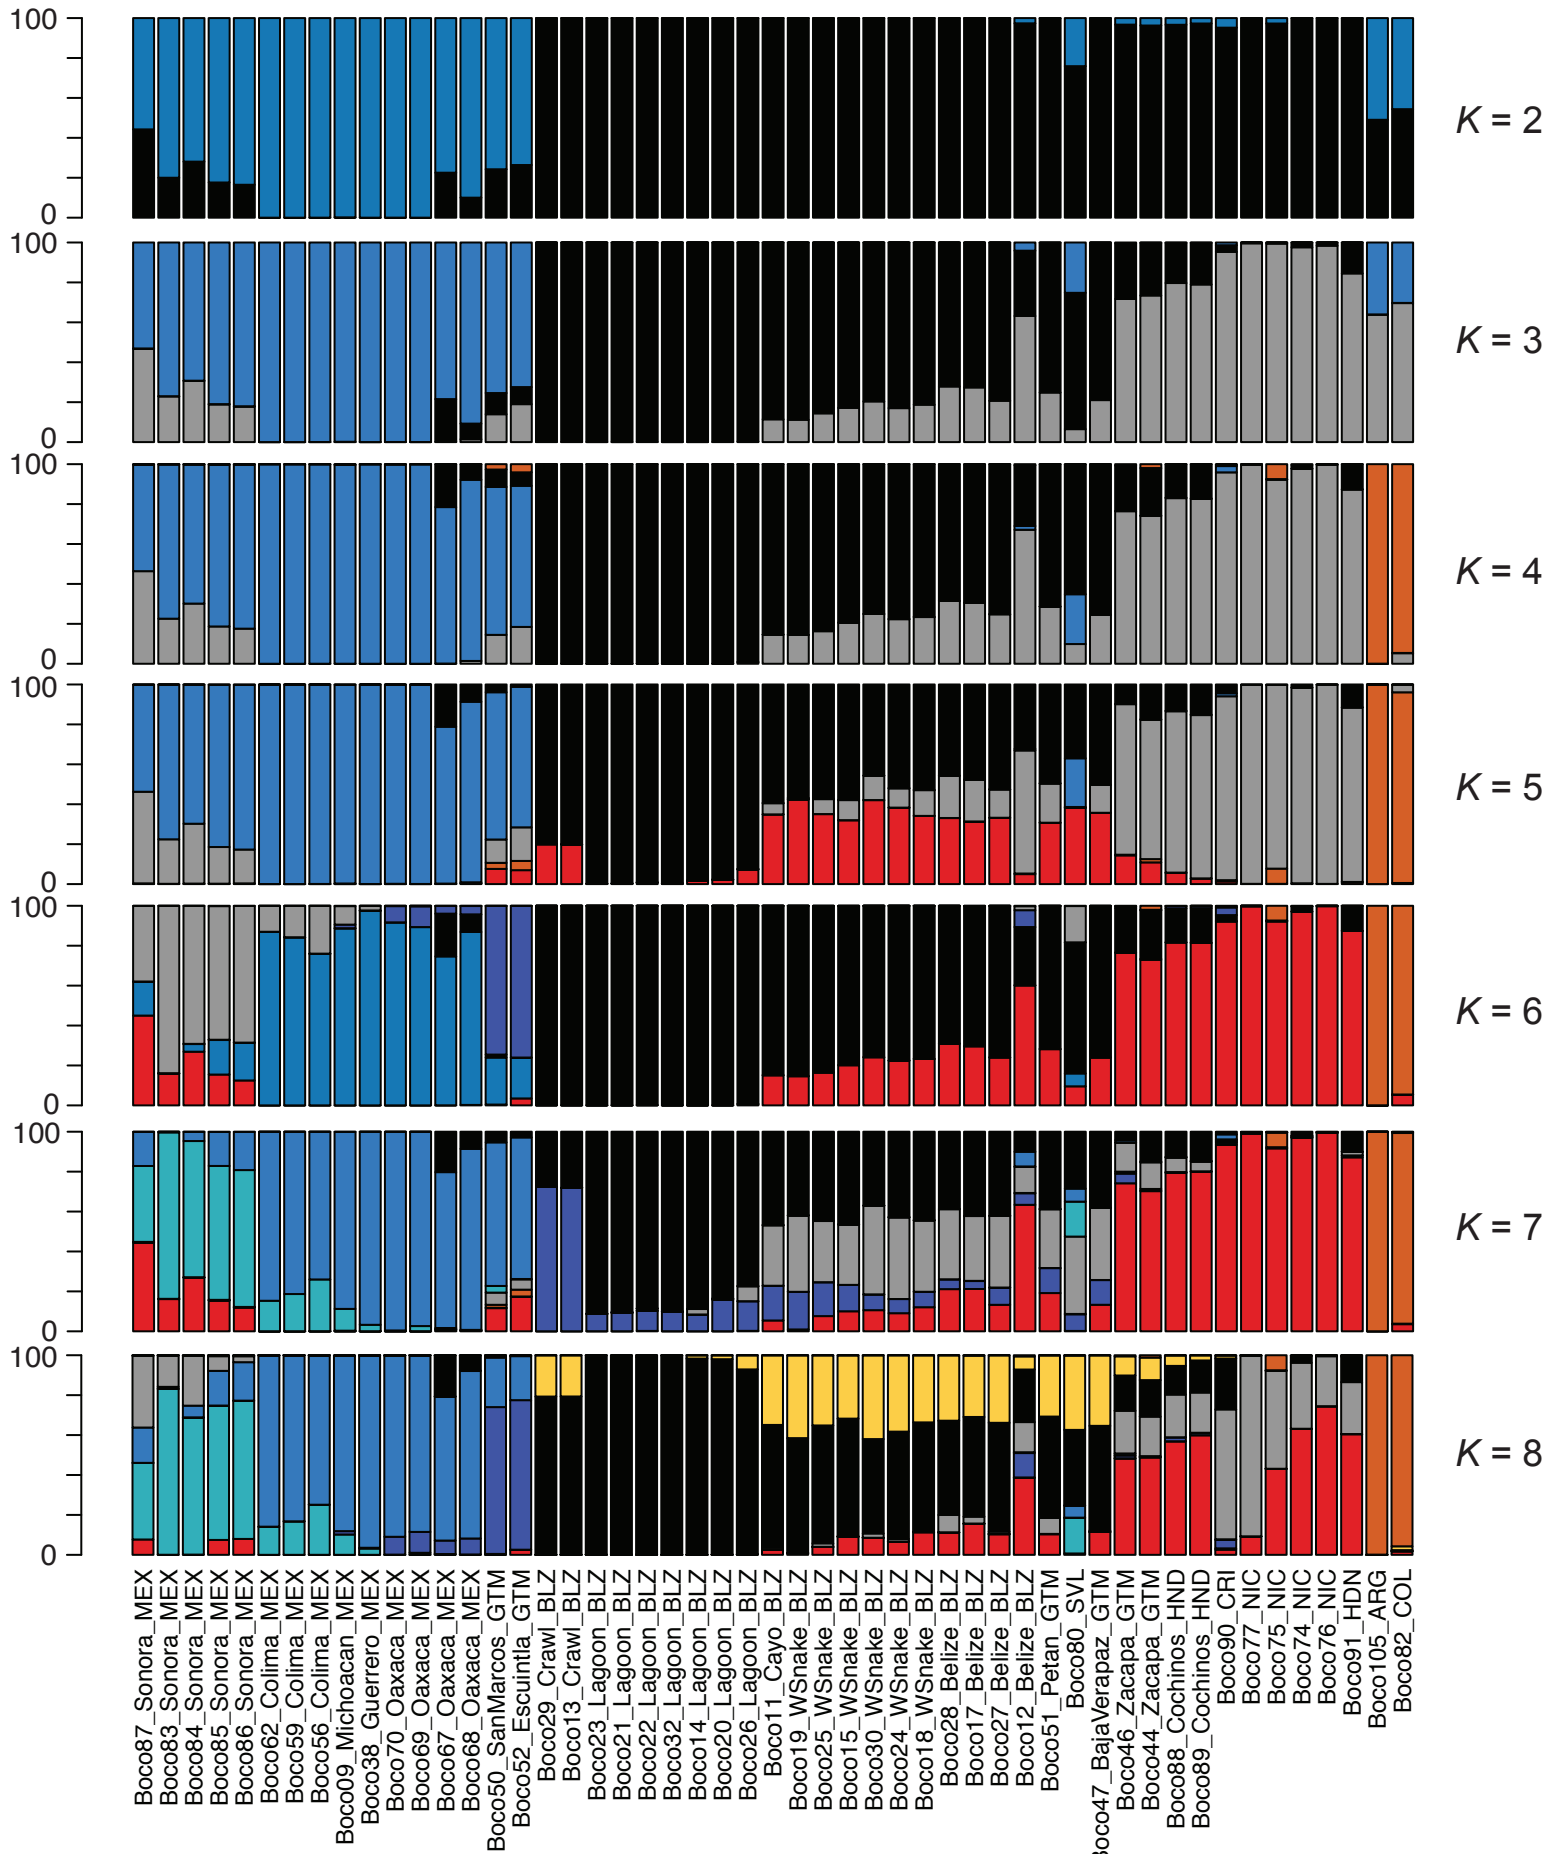

Supplement: NIHMS955144-supplement-Fig_S3.pdf [file NIHMS955144-supplement-Fig_S3.pdf]

**A.**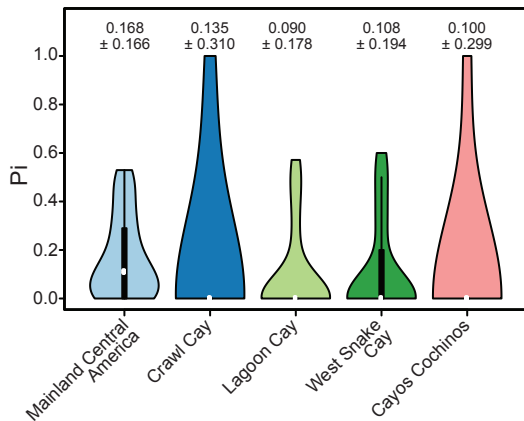**B.**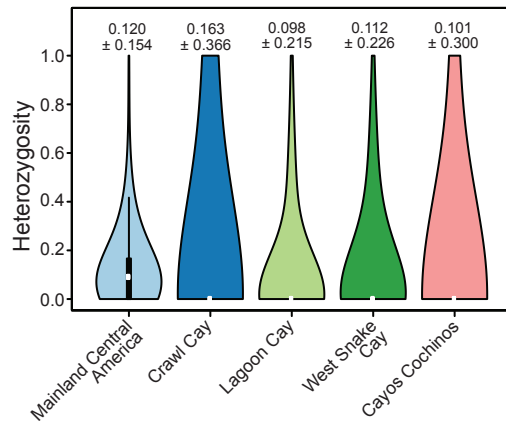**C.**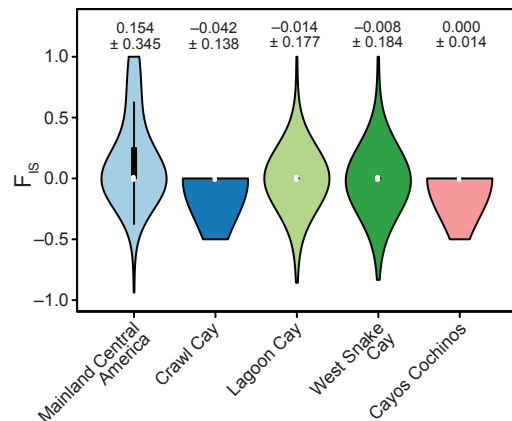**D.**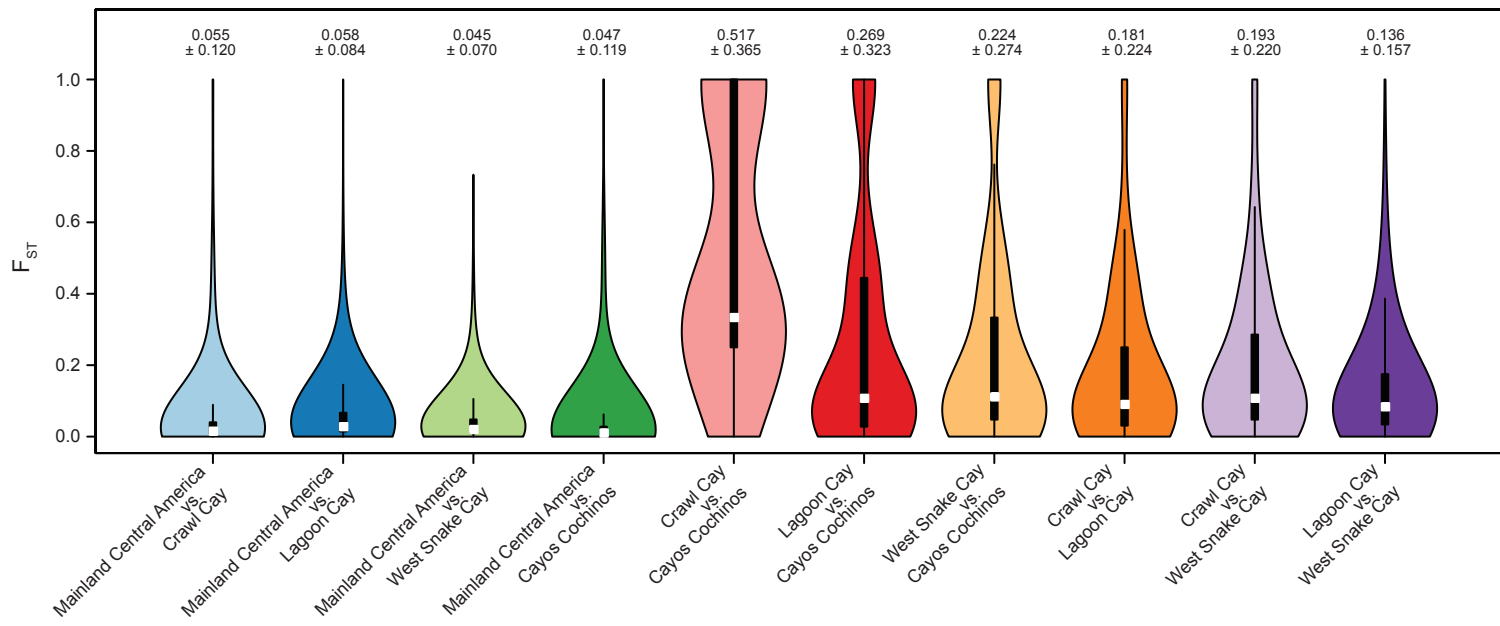

Supplement: NIHMS955144-supplement-Fig_S4.pdf [file NIHMS955144-supplement-Fig_S4.pdf]
